# Supplementary material for: Racial and Ethnic Differences in Outcomes of a 12-Week Digital Rehabilitation Program for Musculoskeletal Pain: Prospective Longitudinal Cohort Study
Source: PubMed Central journal article supplement (PMC9664333; doi:10.2196/41306), 2022-10-31
Supplement: jmir_v24i10e41306_app1.pdf [file jmir_v24i10e41306_app1.pdf]

Supplementary Material

**Racial differences in outcomes of a 12-week digital rehabilitation program for musculoskeletal pain: a prospective longitudinal cohort study**

Justin K. Scheer, MD§; Fabiola Costa, PhD§; Maria Molinos, PhD; Anabela C. Areias, PhD; Dora Janela, PT; Robert G. Moulder, PhD; Jorge Lains, MD; Virgílio Bento, PhD; Vijay Yanamadala, MD; Steven P. Cohen, MD PhD; Fernando Dias Correia, MD PhD

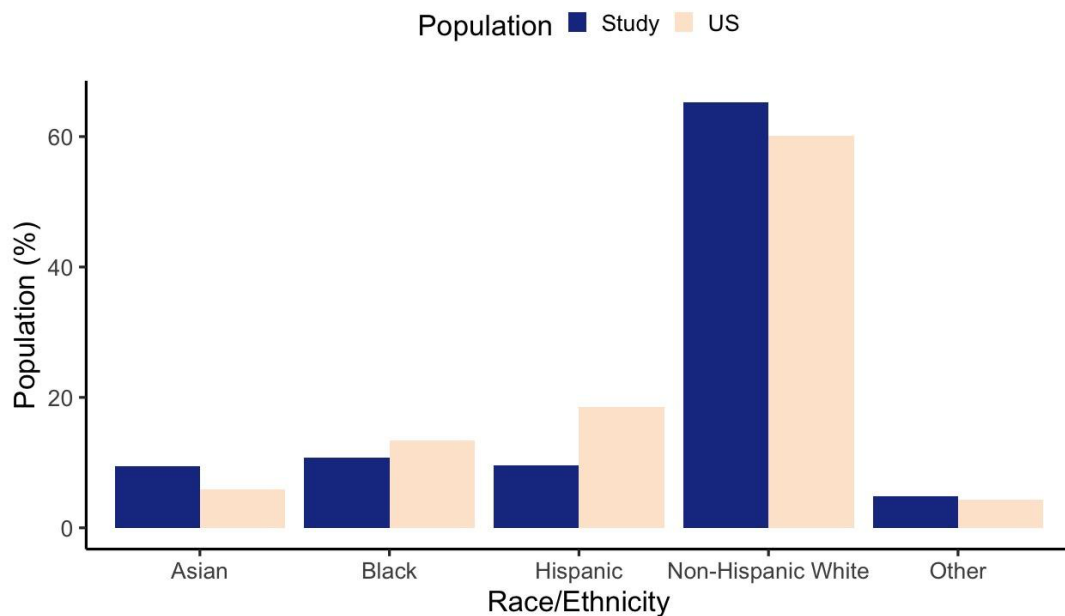

**Supplementary Figure 1.** Comparison of the patients self-reported race/ethnic groups to the US general population. Left columns: study cohort (n=9550); Right columns: 2020 US census (n=297,600,338)[44]

**Supplementary Table 1.** Baseline characteristics for the patients that completed the 12-week program (Completers), and those that did not (Noncompleters)

| Characteristic | Noncompleters | Completers  | P value |
|----------------|---------------|-------------|---------|
| Number         | 2601          | 6949        | NA      |
| Age            | 47.8 (13.4)   | 50.0 (12.7) | <.001   |
| Gender (N,%)   |               |             |         |
| Woman          | 1497 (57.6)   | 4092 (58.9) | 0.298   |
| Man            | 1094 (42.1)   | 2835 (40.8) |         |
| Non-binary     | 6 (0.2)       | 18 (0.3)    |         |

|                                                                         |             |             |       |
|-------------------------------------------------------------------------|-------------|-------------|-------|
| Prefers not to answer                                                   | 4 (0.1)     | 4 (0.1)     |       |
| BMI                                                                     | 29.9 (6.9)  | 29.0 (6.6)  | <.001 |
| Therapy Area (N, %)                                                     |             |             |       |
| Ankle                                                                   | 105 (4.0)   | 247 (3.6)   | <.001 |
| Elbow                                                                   | 50 (1.9)    | 141 (2.0)   |       |
| Hip                                                                     | 209 (8.0)   | 608 (8.7)   |       |
| Knee                                                                    | 304 (11.7)  | 971 (14.0)  |       |
| Low back                                                                | 1185 (45.6) | 2912 (41.9) |       |
| Neck                                                                    | 232 (8.9)   | 650 (9.4)   |       |
| Shoulder                                                                | 354 (13.6)  | 1077 (15.5) |       |
| Wrist/hand                                                              | 98 (3.8)    | 237 (3.4)   |       |
| Employment status (N, %)                                                |             |             |       |
| Employed Full Time                                                      | 2054 (79.0) | 5599 (80.6) | 0.443 |
| Employed Part Time                                                      | 114 (4.4)   | 313 (4.5)   |       |
| Not Employed                                                            | 129 (5.0)   | 285 (4.1)   |       |
| Prefers not to Answer                                                   | 38 (1.5)    | 101 (1.5)   |       |
| Retired                                                                 | 230 (8.8)   | 566 (8.1)   |       |
| Seeking opportunities                                                   | 18 (0.7)    | 48 (0.7)    |       |
| Student                                                                 | 18 (0.7)    | 37 (0.5)    |       |
| Education level (N,%)                                                   |             |             |       |
| Some elementary or middle school                                        | 1(0.1)      | 2(0.1)      | <.001 |
| Some High school                                                        | 8(0.6)      | 12(0.7)     |       |
| High school graduate or GED<br>(includes technical/vocational training) | 191(14.5)   | 198(10.8)   |       |
| Some college (some community college, associate degree)                 | 445(33.9)   | 469(25.5)   |       |
| Four year college degree/bachelor's degree                              | 378(28.8)   | 622(33.8)   |       |
| Some postgraduate or professional schooling, no postgraduate degree     | 46(3.5)     | 65(3.5)     |       |
| Postgraduate or professional degree                                     | 229(17.4)   | 446(24.2)   |       |
| Prefers not to answer                                                   | 15(1.1)     | 26(1.4)     |       |
| Race and Ethnicity                                                      |             |             |       |
| Asian                                                                   | 237 (9.1)   | 673 (9.7)   | 0.258 |
| Black                                                                   | 276 (10.6)  | 749 (10.8)  |       |
| Hispanic                                                                | 277 (10.6)  | 636 (9.2)   |       |

|                              |             |             |                 |
|------------------------------|-------------|-------------|-----------------|
| Other                        | 125 (4.8)   | 337 (4.8)   |                 |
| Non-Hispanic white           | 1686 (64.8) | 4554 (65.5) |                 |
| Clinical Outcomes (mean, SD) |             |             |                 |
| Pain level                   | 5.0 (2.0)   | 4.9 (2.0)   | <i>&lt;.001</i> |
| Surgery Intent>0             | 27.1 (26.3) | 23.5 (23.9) | <i>&lt;.001</i> |
| Surgery Intent               | 11.7 (21.8) | 9.8 (19.3)  | <i>&lt;.001</i> |
| GAD-7 ≥5                     | 9.4 (4.3)   | 8.7 (4.0)   | <i>&lt;.001</i> |
| GAD-7                        | 3.7 (5.0)   | 3.0 (4.4)   | <i>&lt;.001</i> |
| PHQ-9 ≥5                     | 10.3 (4.8)  | 9.1 (4.2)   | <i>&lt;.001</i> |
| PHQ-9                        | 3.1 (5.1)   | 2.3 (4.2)   | <i>&lt;.001</i> |
| WPAI Overall>0               | 31.5 (19.9) | 29.5(19.8)  | <i>0.003</i>    |
| WPAI Overall                 | 19.1 (21.9) | 17.2 (20.9) | <i>&lt;.001</i> |
| WPAI Work>0                  | 30.7 (19.1) | 28.4 (18.6) | <i>&lt;.001</i> |
| WPAI Work                    | 18.3 (21.1) | 16.2 (19.9) | <i>&lt;.001</i> |
| WPAI Time>0                  | 29.6 (34.0) | 24.0 (28.3) | 0.02            |
| WPAI Time                    | 3.4 (14.8)  | 2.7 (12.0)  | 0.033           |
| WPAI Activity>0              | 39.2 (23.0) | 37.0 (22.4) | <i>&lt;.001</i> |
| WPAI Activity                | 31.1 (25.9) | 28.6 (25.1) | <i>&lt;.001</i> |

Data represents mean ± standard deviation or the number of patients and % of total where listed. *P* values represent comparison between completers and non-completers with statistically significant *P* values italicized. Abbreviations: BMI, body mass index; GAD-7, Generalized Anxiety Disorder 7-item scale; PHQ-9, Patient Health 9-item questionnaire; WPAI, Work Productivity and Activity Impairment questionnaire.

**Supplementary Table 2.** Baseline and 12-week estimated outcome metrics following an intention-to-treat (ITT) and per-protocol (PP) analysis for each of the race/ethnic groups using unfiltered data

|                |                | Asian           |                 | Black             |                   | Hispanic         |                  | Non-Hispanic white |                 | Other           |                 |
|----------------|----------------|-----------------|-----------------|-------------------|-------------------|------------------|------------------|--------------------|-----------------|-----------------|-----------------|
| Outcome        | Time           | ITT             | PP              | ITT               | PP                | ITT              | PP               | ITT                | PP              | ITT             | PP              |
| Pain Level     | Baseline       | 4.6 (4.5; 4.8)  | 4.6 (4.5; 4.8)  | 5.6 (5.4; 5.7)    | 5.5 (5.4; 5.7)    | 5.3 (5.1; 5.4)   | 5.3 (5.1; 5.5)   | 4.8 (4.7; 4.8)     | 4.7 (4.6; 4.7)  | 4.8 (4.6; 5.0)  | 4.7 (4.5; 4.9)  |
|                | 12-week        | 2.6 (2.4; 2.8)  | 2.6 (2.4; 2.8)  | 3.2 (3.0; 3.5)    | 3.2 (2.9; 3.5)    | 2.7 (2.5; 3.0)   | 2.7 (2.4; 2.9)   | 2.8 (2.8; 2.9)     | 2.8 (2.7; 2.9)  | 2.9 (2.6; 3.2)  | 2.8 (2.5; 3.1)  |
|                | <i>P</i> value | <i>&lt;.001</i> | <i>&lt;.001</i> | <i>&lt;.001</i>   | <i>&lt;.001</i>   | <i>&lt;.001</i>  | <i>&lt;.001</i>  | <i>&lt;.001</i>    | <i>&lt;.001</i> | <i>&lt;.001</i> | <i>&lt;.001</i> |
| Surgery Intent | Baseline       | 1.3 (6.3; 8.2)  | 6.6 (5.5; 7.7)  | 12.8 (11.4; 14.2) | 12.5 (10.9; 14.1) | 10.8 (9.5; 12.1) | 10.8 (9.2; 12.4) | 10.3 (9.8; 10.7)   | 9.6 (9.1; 10.2) | 8.0 (6.4; 9.7)  | 8.0 (6.1; 9.8)  |

|                              |                |                   |                   |                    |                   |                   |                   |                   |                   |                   |                   |
|------------------------------|----------------|-------------------|-------------------|--------------------|-------------------|-------------------|-------------------|-------------------|-------------------|-------------------|-------------------|
|                              | 12-week        | 4.7 (3.2; 6.2)    | 4.4 (2.9; 5.9)    | 7.5 (5.6; 9.3)     | 7.3 (5.4; 9.2)    | 5.4 (4.0; 6.8)    | 5.1 (3.6; 6.7)    | 6.9 (6.2; 7.3)    | 6.4 (5.7; 7.0)    | 4.6 (2.4; 6.8)    | 4.6 (2.3; 6.9)    |
|                              | <i>P</i> value | 0.020             | <.001             | 0.004              | <.001             | <.001             | <.001             | <.001             | <.001             | 0.03              | 0.004             |
| GAD-7                        | Baseline       | 2.7 (2.4; 3.0)    | 2.6 (2.3; 2.9)    | 3.0 (2.7; 3.3)     | 2.9 (2.5; 3.2)    | 4.0 (3.6; 4.3)    | 3.6 (3.2; 4.00)   | 3.2 (3.1; 3.3)    | 3.0 (2.9; 3.2)    | 3.3 (2.9; 3.8)    | 3.1 (2.6; 3.6)    |
|                              | 12-week        | 1.5 (1.2; 1.7)    | 1.4 (1.1; 1.7)    | 1.8 (1.5; 2.1)     | 1.7 (1.4; 2.0)    | 2.4 (2.0; 2.8)    | 2.2 (1.8; 2.6)    | 2.1 (2.0; 2.3)    | 2.0 (1.9; 2.2)    | 2.1 (1.7; 2.7)    | 2.0 (1.4; 2.5)    |
|                              | <i>P</i> value | 0.38              | <.001             | 0.04               | <.001             | 0.39              | <.001             | <.001             | <.001             | 0.09              | <.001             |
| PHQ-9                        | Baseline       | 1.8 (1.6; 2.0)    | 1.8 (1.5; 2.0)    | 2.7 (2.4; 2.9)     | 2.4 (2.1; 2.7)    | 2.8 (2.49; 3.1)   | 2.4 (2.1; 2.8)    | 2.5 (2.4; 2.6)    | 2.3 (2.2; 2.4)    | 2.8 (2.3; 3.2)    | 2.4 (2.0; 2.9)    |
|                              | 12-week        | 1.1 (0.9; 1.4)    | 1.1 (0.8; 1.4)    | 1.8 (1.5; 2.1)     | 1.6 (1.3; 2.0)    | 2.1 (1.7; 2.5)    | 1.9 (1.5; 2.3)    | 1.8 (1.7; 1.9)    | 1.6 (1.5; 1.8)    | 2.0 (1.5; 2.6)    | 1.8 (1.2; 2.4)    |
|                              | <i>P</i> value | 0.93              | <.001             | 0.41               | <.001             | 0.28              | 0.004             | .001              | <.001             | 0.92              | 0.020             |
| WPAI Overall Work Impairment | Baseline       | 15.9 (14.5; 17.2) | 15.5 (14.0; 17.0) | 20.4 (18.7; 22.12) | 20.5 (18.5; 22.5) | 19.3 (17.6; 21.0) | 18.7 (16.7; 20.6) | 17.2 (16.6; 17.8) | 16.6 (15.9; 17.2) | 18.5 (16.3; 20.7) | 18.4 (16.0; 20.9) |
|                              | 12-week        | 10.4 (8.2; 12.6)  | 9.9 (7.7; 12.2)   | 10.9 (8.6; 13.2)   | 10.9 (8.6; 13.3)  | 12.6 (9.9; 15.3)  | 12.2 (9.5; 15.0)  | 11.0 (10.1; 11.8) | 10.6 (9.7; 11.4)  | 14.1 (10.8; 17.5) | 13.5 (10.2; 16.8) |
|                              | <i>P</i> value | 0.03              | <.001             | 0.003              | <.001             | 0.01              | <.001             | <.001             | <.001             | 0.07              | 0.004             |
| WPAI Work Impairment         | Baseline       | 14.9 (13.6; 16.2) | 14.5 (13.1; 16.0) | 19.2 (17.5; 20.8)  | 19.2 (17.3; 21.1) | 18.1 (16.5; 19.7) | 17.2 (15.4; 19.1) | 16.3 (15.8; 16.9) | 15.7 (15.1; 16.3) | 17.4 (15.3; 19.4) | 17.2 (14.9; 19.5) |
|                              | 12-week        | 9.2 (7.2; 11.2)   | 8.8 (6.8; 10.8)   | 9.9 (7.8; 12.0)    | 9.9 (7.7; 12.1)   | 10.9 (8.5; 13.4)  | 10.4 (8.0; 12.9)  | 10.0 (9.2; 10.8)  | 9.6 (8.8; 10.4)   | 12.3 (9.5; 15.1)  | 11.6 (8.8; 14.3)  |
|                              | <i>P</i> value | 0.02              | <.001             | 0.003              | <.001             | 0.01              | <.001             | <.001             | <.001             | 0.05              | <.001             |
| WPAI Time Missed             | Baseline       | 2.2 (1.5; 2.9)    | 2.3 (1.4; 3.1)    | 4.9 (3.6; 6.2)     | 4.4 (3.0; 5.8)    | 3.8 (2.7; 4.9)    | 3.8 (2.5; 5.0)    | 2.3 (2.0; 2.6)    | 2.1 (1.8; 2.5)    | 4.8 (3.0; 6.5)    | 4.5 (2.5; 6.5)    |
|                              | 12-week        | 2.0 (0.8; 3.1)    | 2.0 (0.8; 3.2)    | 2.7 (1.1; 4.3)     | 2.7 (1.1; 4.4)    | 3.2 (1.5; 4.9)    | 3.2 (1.5; 4.9)    | 2.6 (2.0; 3.2)    | 2.4 (1.9; 3.0)    | 5.0 (1.7; 8.2)    | 5.0 (1.7; 8.4)    |
|                              | <i>P</i> value | 0.97              | 0.744             | 0.44               | 0.060             | 0.16              | 0.578             | <.001             | 0.320             | 0.95              | 0.797             |
| WPAI Activity Impairment     | Baseline       | 23.1 (21.6; 24.7) | 23.1 (21.3; 24.8) | 30.0 (28.3; 31.7)  | 29.9 (27.9; 31.8) | 28.7 (27.0; 30.5) | 27.6 (25.5; 29.6) | 29.8 (29.2; 30.4) | 29.0 (28.3; 29.7) | 29.8 (27.5; 32.1) | 29.3 (26.5; 32.0) |
|                              | 12-week        | 12.5 (10.6; 14.5) | 12.3 (10.3; 14.4) | 16.9 (14.5; 19.4)  | 16.8 (14.4; 19.3) | 15.0 (12.6; 17.3) | 14.0 (11.7; 16.3) | 17.5 (16.6; 18.4) | 17.0 (16.0; 17.8) | 19.5 (16.0; 22.8) | 18.3 (14.9; 21.6) |
|                              | <i>P</i> value | <.001             | <.001             | <.001              | <.001             | <.001             | <.001             | <.001             | <.001             | .001              | <.001             |

**Supplementary Table 3. Intention-to-treat Latent Growth Curve analysis**

| <b>Intention-to-treat</b> |                                    |          |                                |          |                                |          |
|---------------------------|------------------------------------|----------|--------------------------------|----------|--------------------------------|----------|
| <b>White</b>              |                                    |          |                                |          |                                |          |
| <b>Outcome</b>            | <b>Intercept - White</b>           |          | <b>Slope - White</b>           |          | <b>Curve - White</b>           |          |
|                           | <b>Mean (SD)</b>                   | <b>p</b> | <b>Mean (SD)</b>               | <b>p</b> | <b>Mean (SD)</b>               | <b>p</b> |
| Pain Level                | 4.75                               | < .001   | -0.38                          | < .001   | 0.02                           | < .001   |
| Surgery Intent >0         | 24.06                              | < .001   | -2.68                          | < .001   | 0.15                           | < .001   |
| Surgery Intent            | 10.25                              | < .001   | -0.85                          | < .001   | 0.05                           | < .001   |
| GAD-7 ≥5                  | 8.82                               | < .001   | -0.79                          | < .001   | 0.04                           | < .001   |
| GAD-7                     | 3.20                               | < .001   | -0.15                          | < .001   | 0.01                           | < .001   |
| PHQ-9 ≥5                  | 9.52                               | < .001   | -0.98                          | < .001   | 0.05                           | < .001   |
| PHQ-9                     | 2.50                               | < .001   | -0.12                          | < .001   | 0                              | < .001   |
| WPAI Overall >0           | 29.00                              | < .001   | -3.04                          | < .001   | 0.16                           | < .001   |
| WPAI Overall              | 17.19                              | < .001   | -1.29                          | < .001   | 0.06                           | < .001   |
| WPAI Activity >0          | 37.08                              | < .001   | -3.47                          | < .001   | 0.17                           | < .001   |
| WPAI Activity             | 29.83                              | < .001   | -2.40                          | < .001   | 0.11                           | < .001   |
| WPAI Work >0              | 28.02                              | < .001   | -3.03                          | < .001   | 0.16                           | < .001   |
| WPAI Work                 | 16.32                              | < .001   | -1.27                          | < .001   | 0.06                           | < .001   |
| WPAI Time >0              | 22.97                              | < .001   | -3.16                          | < .001   | 0.16                           | < .001   |
| WPAI Time                 | 2.31                               | < .001   | 0.03                           | 0.682    | 0                              | 0.941    |
| <b>Asian</b>              |                                    |          |                                |          |                                |          |
| <b>Outcome</b>            | <b>Diff Intercept versus White</b> |          | <b>Diff Slope versus White</b> |          | <b>Diff Curve versus White</b> |          |
|                           | <b>Mean (SD)</b>                   | <b>p</b> | <b>Mean (SD)</b>               | <b>p</b> | <b>Mean (SD)</b>               | <b>p</b> |
| Pain Level                | -0.1                               | 0.146    | -0.05                          | 0.078    | 0                              | 0.164    |
| Surgery Intent >0         | -5.42                              | < .001   | -0.48                          | 0.243    | 0.05                           | 0.152    |
| Surgery Intent            | -3                                 | < .001   | -0.18                          | 0.348    | 0.02                           | 0.193    |
| GAD-7 ≥5                  | -0.75                              | 0.001    | -0.11                          | 0.375    | 0.01                           | 0.598    |
| GAD-7                     | -0.5                               | < .001   | -0.03                          | 0.431    | 0                              | 0.626    |
| PHQ-9 ≥5                  | -1.28                              | < .001   | -0.02                          | 0.894    | 0                              | 0.99     |
| PHQ-9                     | -0.69                              | < .001   | 0.01                           | 0.81     | 0                              | 0.877    |
| WPAI Overall >0           | -1.54                              | 0.099    | -0.4                           | 0.338    | 0.03                           | 0.493    |
| WPAI Overall              | -1.31                              | 0.08     | -0.15                          | 0.591    | 0.02                           | 0.48     |
| WPAI Activity >0          | -4.31                              | < .001   | -0.66                          | 0.069    | 0.05                           | 0.07     |
| WPAI Activity             | -6.69                              | < .001   | 0.12                           | 0.703    | 0                              | 0.937    |
| WPAI Work >0              | -1.72                              | 0.053    | -0.31                          | 0.436    | 0.02                           | 0.629    |
| WPAI Work                 | -1.41                              | 0.047    | -0.11                          | 0.675    | 0.01                           | 0.552    |
| WPAI Time >0              | -3.98                              | 0.16     | -0.16                          | 0.874    | 0.04                           | 0.666    |
| WPAI Time                 | -0.13                              | 0.73     | -0.27                          | 0.064    | 0.02                           | 0.133    |
| <b>Black</b>              |                                    |          |                                |          |                                |          |
| <b>Outcome</b>            | <b>Diff Intercept versus White</b> |          | <b>Diff Slope versus White</b> |          | <b>Diff Curve versus White</b> |          |
|                           | <b>Mean (SD)</b>                   | <b>p</b> | <b>Mean (SD)</b>               | <b>p</b> | <b>Mean (SD)</b>               | <b>p</b> |
| Pain Level                | 0.82                               | < .001   | -0.09                          | 0.009    | 0                              | 0.146    |
| Surgery Intent >0         | 4.76                               | < .001   | -1.54                          | 0.003    | 0.11                           | 0.013    |
| Surgery Intent            | 2.59                               | < .001   | -0.63                          | 0.02     | 0.04                           | 0.073    |
| GAD-7 ≥5                  | 0.42                               | 0.108    | -0.14                          | 0.213    | 0                              | 0.626    |
| GAD-7                     | -0.22                              | 0.152    | 0.03                           | 0.528    | 0                              | 0.343    |
| PHQ-9 ≥5                  | -0.03                              | 0.916    | 0.06                           | 0.722    | -0.01                          | 0.556    |
| PHQ-9                     | 0.17                               | 0.274    | -0.02                          | 0.676    | 0                              | 0.849    |
| WPAI Overall >0           | 6.58                               | < .001   | -1.23                          | 0.033    | 0.06                           | 0.254    |
| WPAI Overall              | 3.23                               | < .001   | -0.2                           | 0.591    | -0.01                          | 0.844    |
| WPAI Activity >0          | 4.97                               | < .001   | -1.04                          | 0.017    | 0.06                           | 0.092    |
| WPAI Activity             | 0.16                               | 0.859    | 0                              | 0.995    | 0                              | 0.866    |
| WPAI Work >0              | 6.17                               | < .001   | -1.4                           | 0.011    | 0.07                           | 0.113    |
| WPAI Work                 | 2.84                               | 0.001    | -0.32                          | 0.368    | 0.01                           | 0.826    |
| WPAI Time >0              | 14.46                              | < .001   | -0.41                          | 0.676    | -0.03                          | 0.678    |
| WPAI Time                 | 2.59                               | < .001   | 0.39                           | 0.158    | -0.05                          | 0.031    |
| <b>Hispanic</b>           |                                    |          |                                |          |                                |          |

| Outcome           | Diff Intercept versus White |          | Diff Slope versus White |          | Diff Curve versus White |          |
|-------------------|-----------------------------|----------|-------------------------|----------|-------------------------|----------|
|                   | Mean (SD)                   | <i>p</i> | Mean (SD)               | <i>p</i> | Mean (SD)               | <i>p</i> |
| Pain Level        | 0.52                        | < .001   | -0.02                   | 0.448    | 0                       | 0.305    |
| Surgery Intent >0 | 1.87                        | 0.169    | -0.06                   | 0.915    | -0.02                   | 0.662    |
| Surgery Intent    | 0.55                        | 0.442    | -0.03                   | 0.896    | -0.01                   | 0.582    |
| GAD-7 ≥5          | 1.05                        | < .001   | -0.04                   | 0.741    | 0                       | 0.665    |
| GAD-7             | 0.76                        | < .001   | -0.05                   | 0.255    | 0                       | 0.797    |
| PHQ-9 ≥5          | 0.52                        | 0.142    | 0.13                    | 0.435    | -0.01                   | 0.666    |
| PHQ-9             | 0.31                        | 0.075    | 0                       | 0.982    | 0                       | 0.967    |
| WPAI Overall >0   | 4.52                        | < .001   | 0.63                    | 0.275    | -0.07                   | 0.19     |
| WPAI Overall      | 2.1                         | 0.021    | 0.3                     | 0.398    | -0.03                   | 0.367    |
| WPAI Activity >0  | 2.41                        | 0.014    | -0.11                   | 0.777    | -0.02                   | 0.547    |
| WPAI Activity     | -1.12                       | 0.236    | 0.39                    | 0.221    | -0.04                   | 0.106    |
| WPAI Work >0      | 4.07                        | < .001   | 0.4                     | 0.477    | -0.04                   | 0.365    |
| WPAI Work         | 1.77                        | 0.041    | 0.18                    | 0.581    | -0.02                   | 0.459    |
| WPAI Time >0      | 5.56                        | 0.115    | -0.87                   | 0.44     | 0.03                    | 0.746    |
| WPAI Time         | 1.5                         | 0.011    | 0.1                     | 0.7      | -0.01                   | 0.508    |
| <b>Other</b>      |                             |          |                         |          |                         |          |
| Outcome           | Diff Intercept versus White |          | Diff Slope versus White |          | Diff Curve versus White |          |
|                   | Mean (SD)                   | <i>p</i> | Mean (SD)               | <i>p</i> | Mean (SD)               | <i>p</i> |
| Pain Level        | 0.02                        | 0.792    | -0.02                   | 0.579    | 0                       | 0.554    |
| Surgery Intent >0 | -2.51                       | 0.166    | 0.32                    | 0.656    | -0.03                   | 0.578    |
| Surgery Intent    | -2.21                       | 0.01     | 0.41                    | 0.215    | -0.03                   | 0.211    |
| GAD-7 ≥5          | 0.7                         | 0.063    | 0                       | 0.986    | 0                       | 0.823    |
| GAD-7             | 0.15                        | 0.515    | 0.04                    | 0.579    | 0                       | 0.44     |
| PHQ-9 ≥5          | 0.47                        | 0.323    | -0.02                   | 0.889    | 0.01                    | 0.579    |
| PHQ-9             | 0.28                        | 0.233    | -0.03                   | 0.605    | 0                       | 0.627    |
| WPAI Overall >0   | 0.4                         | 0.771    | 0.13                    | 0.833    | 0                       | 0.986    |
| WPAI Overall      | 1.34                        | 0.245    | 0                       | 0.995    | 0.01                    | 0.73     |
| WPAI Activity >0  | 0.66                        | 0.592    | 0.15                    | 0.77     | 0                       | 0.919    |
| WPAI Activity     | -0.07                       | 0.954    | 0.22                    | 0.61     | 0                       | 0.9      |
| WPAI Work >0      | 0.14                        | 0.914    | 0.16                    | 0.78     | 0                       | 0.923    |
| WPAI Work         | 1.04                        | 0.336    | 0.12                    | 0.785    | 0                       | 0.979    |
| WPAI Time >0      | 6.55                        | 0.152    | 0.09                    | 0.955    | -0.07                   | 0.552    |
| WPAI Time         | 2.46                        | 0.007    | -0.29                   | 0.354    | 0.02                    | 0.382    |

**Supplementary Table 4. Per-protocol Latent Growth Curve analysis**

| Outcome           | Per-protocol      |          |               |          |               |          |
|-------------------|-------------------|----------|---------------|----------|---------------|----------|
|                   | White             |          |               |          |               |          |
|                   | Intercept - White |          | Slope - White |          | Curve - White |          |
|                   | Mean (SD)         | <i>p</i> | Mean (SD)     | <i>p</i> | Mean (SD)     | <i>p</i> |
| Pain Level        | 4.68              | < .001   | -0.38         | < .001   | 0.02          | < .001   |
| Surgery Intent >0 | 22.82             | < .001   | -2.68         | < .001   | 0.15          | < .001   |
| Surgery Intent    | 9.60              | < .001   | -0.85         | < .001   | 0.05          | < .001   |
| GAD-7 ≥5          | 8.59              | < .001   | -0.77         | < .001   | 0.04          | < .001   |
| GAD-7             | 3.03              | < .001   | -0.14         | < .001   | 0.01          | < .001   |
| PHQ-9 ≥5          | 9.21              | < .001   | -0.95         | < .001   | 0.05          | < .001   |
| PHQ-9             | 2.31              | < .001   | -0.11         | < .001   | 0             | < .001   |
| WPAI Overall >0   | 28.34             | < .001   | -2.99         | < .001   | 0.16          | < .001   |
| WPAI Overall      | 16.57             | < .001   | -1.24         | < .001   | 0.06          | < .001   |
| WPAI Activity >0  | 36.24             | < .001   | -3.47         | < .001   | 0.17          | < .001   |
| WPAI Activity     | 28.96             | < .001   | -2.37         | < .001   | 0.11          | < .001   |
| WPAI Work >0      | 27.30             | < .001   | -2.96         | < .001   | 0.16          | < .001   |
| WPAI Work         | 15.71             | < .001   | -1.23         | < .001   | 0.06          | < .001   |
| WPAI Time >0      | 21.63             | < .001   | -3.29         | < .001   | 0.18          | < .001   |
| WPAI Time         | 2.13              | < .001   | 0.01          | 0.886    | 0             | 0.827    |

| Asian             |                             |        |                         |       |                         |       |
|-------------------|-----------------------------|--------|-------------------------|-------|-------------------------|-------|
| Outcome           | Diff Intercept versus White |        | Diff Slope versus White |       | Diff Curve versus White |       |
|                   | Mean (SD)                   | p      | Mean (SD)               | p     | Mean (SD)               | p     |
| Pain Level        | -0.08                       | 0.353  | -0.05                   | 0.101 | 0                       | 0.196 |
| Surgery Intent >0 | -5.44                       | < .001 | -0.27                   | 0.533 | 0.03                    | 0.306 |
| Surgery Intent    | -3                          | < .001 | -0.08                   | 0.694 | 0.01                    | 0.393 |
| GAD-7 ≥5          | -0.58                       | 0.041  | -0.1                    | 0.429 | 0                       | 0.664 |
| GAD-7             | -0.44                       | 0.007  | -0.02                   | 0.624 | 0                       | 0.891 |
| PHQ-9 ≥5          | -1.18                       | < .001 | -0.04                   | 0.777 | 0                       | 0.854 |
| PHQ-9             | -0.56                       | < .001 | 0.01                    | 0.852 | 0                       | 0.908 |
| WPAI Overall >0   | -1.23                       | 0.248  | -0.59                   | 0.168 | 0.04                    | 0.306 |
| WPAI Overall      | -1.07                       | 0.21   | -0.28                   | 0.36  | 0.03                    | 0.315 |
| WPAI Activity >0  | -3.05                       | 0.004  | -0.78                   | 0.045 | 0.06                    | 0.06  |
| WPAI Activity     | -5.91                       | < .001 | 0.05                    | 0.888 | 0.01                    | 0.841 |
| WPAI Work >0      | -1.4                        | 0.168  | -0.5                    | 0.229 | 0.03                    | 0.405 |
| WPAI Work         | -1.19                       | 0.14   | -0.22                   | 0.452 | 0.02                    | 0.395 |
| WPAI Time >0      | -1.4                        | 0.679  | -0.09                   | 0.93  | 0.01                    | 0.899 |
| WPAI Time         | 0.13                        | 0.783  | -0.29                   | 0.06  | 0.02                    | 0.121 |
| Black             |                             |        |                         |       |                         |       |
| Outcome           | Diff Intercept versus White |        | Diff Slope versus White |       | Diff Curve versus White |       |
|                   | Mean (SD)                   | p      | Mean (SD)               | p     | Mean (SD)               | p     |
| Pain Level        | 0.86                        | < .001 | -0.09                   | 0.009 | 0                       | 0.135 |
| Surgery Intent >0 | 4.89                        | 0.002  | -1.49                   | 0.007 | 0.1                     | 0.019 |
| Surgery Intent    | 2.87                        | < .001 | -0.66                   | 0.019 | 0.04                    | 0.051 |
| GAD-7 ≥5          | 0.4                         | 0.199  | -0.15                   | 0.204 | 0                       | 0.646 |
| GAD-7             | -0.18                       | 0.303  | 0.04                    | 0.402 | 0                       | 0.229 |
| PHQ-9 ≥5          | -0.2                        | 0.555  | 0.09                    | 0.597 | -0.01                   | 0.478 |
| PHQ-9             | 0.08                        | 0.614  | -0.01                   | 0.909 | 0                       | 0.974 |
| WPAI Overall >0   | 6.69                        | < .001 | -1.2                    | 0.045 | 0.06                    | 0.266 |
| WPAI Overall      | 3.92                        | < .001 | -0.35                   | 0.388 | 0                       | 0.899 |
| WPAI Activity >0  | 5.67                        | < .001 | -0.92                   | 0.046 | 0.05                    | 0.178 |
| WPAI Activity     | 0.89                        | 0.402  | 0.02                    | 0.968 | -0.01                   | 0.791 |
| WPAI Work >0      | 6.42                        | < .001 | -1.39                   | 0.016 | 0.07                    | 0.121 |
| WPAI Work         | 3.52                        | < .001 | -0.46                   | 0.219 | 0.02                    | 0.588 |
| WPAI Time >0      | 11.36                       | 0.007  | 0.6                     | 0.559 | -0.09                   | 0.229 |
| WPAI Time         | 2.27                        | 0.002  | 0.54                    | 0.056 | -0.06                   | 0.013 |
| Hispanic          |                             |        |                         |       |                         |       |
| Outcome           | Diff Intercept versus White |        | Diff Slope versus White |       | Diff Curve versus White |       |
|                   | Mean (SD)                   | p      | Mean (SD)               | p     | Mean (SD)               | p     |
| Pain Level        | 0.62                        | < .001 | -0.05                   | 0.142 | 0                       | 0.59  |
| Surgery Intent >0 | 2.83                        | 0.083  | -0.3                    | 0.603 | 0                       | 0.954 |
| Surgery Intent    | 1.21                        | 0.16   | -0.2                    | 0.459 | 0                       | 0.984 |
| GAD-7 ≥5          | 1.17                        | < .001 | -0.05                   | 0.639 | 0                       | 0.764 |
| GAD-7             | 0.57                        | 0.006  | -0.02                   | 0.623 | 0                       | 0.829 |
| PHQ-9 ≥5          | 0.38                        | 0.355  | 0.16                    | 0.339 | -0.01                   | 0.613 |
| PHQ-9             | 0.13                        | 0.506  | 0.03                    | 0.481 | 0                       | 0.592 |
| WPAI Overall >0   | 4.75                        | < .001 | 0.71                    | 0.228 | -0.07                   | 0.164 |
| WPAI Overall      | 2.09                        | 0.051  | 0.34                    | 0.343 | -0.03                   | 0.315 |
| WPAI Activity >0  | 2.15                        | 0.062  | 0                       | 0.994 | -0.03                   | 0.431 |
| WPAI Activity     | -1.39                       | 0.206  | 0.47                    | 0.153 | -0.05                   | 0.061 |
| WPAI Work >0      | 4.01                        | 0.002  | 0.53                    | 0.363 | -0.05                   | 0.295 |
| WPAI Work         | 1.5                         | 0.131  | 0.27                    | 0.435 | -0.03                   | 0.351 |
| WPAI Time >0      | 5.2                         | 0.17   | -0.14                   | 0.898 | -0.03                   | 0.691 |
| WPAI Time         | 1.63                        | 0.014  | 0.09                    | 0.731 | -0.01                   | 0.532 |
| Other             |                             |        |                         |       |                         |       |
| Outcome           | Diff Intercept versus White |        | Diff Slope versus White |       | Diff Curve versus White |       |
|                   | Mean (SD)                   | p      | Mean (SD)               | p     | Mean (SD)               | p     |
| Pain Level        | 0                           | 0.984  | -0.02                   | 0.683 | 0                       | 0.721 |

|                   |       |       |       |       |       |       |
|-------------------|-------|-------|-------|-------|-------|-------|
| Surgery Intent >0 | -1.73 | 0.404 | 0.39  | 0.619 | -0.04 | 0.571 |
| Surgery Intent    | -1.65 | 0.096 | 0.41  | 0.248 | -0.03 | 0.241 |
| GAD-7 ≥5          | 0.49  | 0.25  | 0     | 0.988 | 0     | 0.878 |
| GAD-7             | 0.09  | 0.73  | 0.06  | 0.378 | -0.01 | 0.272 |
| PHQ-9 ≥5          | 0.26  | 0.634 | 0.02  | 0.906 | 0     | 0.753 |
| PHQ-9             | 0.13  | 0.615 | 0     | 0.974 | 0     | 0.945 |
| WPAI Overall >0   | 0.59  | 0.703 | 0.1   | 0.87  | 0     | 0.946 |
| WPAI Overall      | 1.87  | 0.152 | -0.07 | 0.877 | 0.01  | 0.737 |
| WPAI Activity >0  | 1.37  | 0.344 | 0.14  | 0.788 | 0     | 0.963 |
| WPAI Activity     | 0.3   | 0.836 | 0.21  | 0.633 | -0.01 | 0.779 |
| WPAI Work >0      | 0.22  | 0.877 | 0.23  | 0.706 | -0.01 | 0.879 |
| WPAI Work         | 1.53  | 0.208 | 0.05  | 0.915 | 0     | 0.979 |
| WPAI Time >0      | 5.14  | 0.316 | -0.11 | 0.94  | -0.05 | 0.676 |
| WPAI Time         | 2.4   | 0.02  | -0.36 | 0.236 | 0.03  | 0.228 |

**Supplementary Table 5.** Model fit for both unfiltered and filtered models

| Outcome           | Intention-to-treat |        |              |             |              | Per-protocol |        |              |             |              |
|-------------------|--------------------|--------|--------------|-------------|--------------|--------------|--------|--------------|-------------|--------------|
|                   | Chi-sq (df)        | p      | RMSEA        | CFI         | SRMR         | Chi-sq (df)  | p      | RMSEA        | CFI         | SRMR         |
| Pain Level        | 215.11 (5)         | < .001 | <b>0.066</b> | <b>0.95</b> | <b>0.022</b> | 204.12 (5)   | < .001 | <b>0.076</b> | <b>0.95</b> | <b>0.022</b> |
| Surgery Intent >0 | 68.8 (5)           | < .001 | <b>0.056</b> | <b>0.98</b> | <b>0.016</b> | 66.57 (5)    | < .001 | <b>0.065</b> | <b>0.98</b> | <b>0.016</b> |
| Surgery Intent    | 24.03 (5)          | < .001 | <b>0.02</b>  | <b>1</b>    | <b>0.006</b> | 20.84 (5)    | < .001 | <b>0.021</b> | <b>1</b>    | <b>0.006</b> |
| GAD-7 ≥5          | 31.86 (5)          | < .001 | <b>0.043</b> | <b>0.98</b> | <b>0.016</b> | 25.71 (5)    | < .001 | <b>0.045</b> | <b>0.99</b> | <b>0.015</b> |
| GAD-7             | 14.78 (5)          | 0.011  | <b>0.014</b> | <b>1</b>    | <b>0.004</b> | 17.44 (5)    | 0.004  | <b>0.019</b> | <b>1</b>    | <b>0.004</b> |
| PHQ-9 ≥5          | 26.83 (5)          | < .001 | <b>0.045</b> | <b>0.98</b> | <b>0.017</b> | 22.55 (5)    | < .001 | <b>0.048</b> | <b>0.98</b> | <b>0.017</b> |
| PHQ-9             | 17.13 (5)          | 0.004  | <b>0.016</b> | <b>1</b>    | <b>0.005</b> | 21.76 (5)    | < .001 | <b>0.022</b> | <b>1</b>    | <b>0.005</b> |
| WPAI Overall >0   | 35.82 (5)          | < .001 | <b>0.037</b> | <b>0.98</b> | <b>0.017</b> | 35.64 (5)    | < .001 | <b>0.044</b> | <b>0.97</b> | <b>0.017</b> |
| WPAI Overall      | 15.94 (5)          | 0.007  | <b>0.015</b> | <b>1</b>    | <b>0.008</b> | 15.77 (5)    | 0.008  | <b>0.018</b> | <b>1</b>    | <b>0.008</b> |
| WPAI Activity >0  | 63.91 (5)          | < .001 | <b>0.04</b>  | <b>0.98</b> | <b>0.015</b> | 57.21 (5)    | < .001 | <b>0.044</b> | <b>0.98</b> | <b>0.015</b> |
| WPAI Activity     | 33.66 (5)          | < .001 | <b>0.024</b> | <b>0.99</b> | <b>0.009</b> | 29.27 (5)    | < .001 | <b>0.026</b> | <b>0.99</b> | <b>0.009</b> |
| WPAI Work >0      | 41.6 (5)           | < .001 | <b>0.041</b> | <b>0.97</b> | <b>0.019</b> | 40.36 (5)    | < .001 | <b>0.047</b> | <b>0.97</b> | <b>0.019</b> |
| WPAI Work         | 19.56 (5)          | 0.002  | <b>0.017</b> | <b>0.99</b> | <b>0.009</b> | 19.58 (5)    | 0.001  | <b>0.02</b>  | <b>0.99</b> | <b>0.009</b> |
| WPAI Time >0      | 7.88 (5)           | 0.163  | <b>0.026</b> | <b>0.99</b> | <b>0.016</b> | 11.75 (5)    | 0.038  | <b>0.047</b> | <b>0.98</b> | <b>0.02</b>  |
| WPAI Time         | 1.57 (5)           | 0.905  | <b>0</b>     | <b>1</b>    | <b>0.003</b> | 2.22 (5)     | 0.818  | <b>0</b>     | <b>1</b>    | <b>0.003</b> |

Note: If a significant chi-square is found for a model, then CFI values > .9, or RMSEA values < .08, or SRMR values < .05 signify models with acceptable fit [45,46].

**Supplementary Table 6.** P values of outcome differences between race/ethnic groups following a per-protocol analysis

| Pain     |       |       |          |          |       | WPAI Overall >0 |       |       |          |          |       |
|----------|-------|-------|----------|----------|-------|-----------------|-------|-------|----------|----------|-------|
|          | Asian | Black | Hispanic | NH-white | Other |                 | Asian | Black | Hispanic | NH-white | Other |
| Asian    |       | 0.052 | <.001    | 0.316    | 0.606 | Asian           |       | 0.067 | 0.897    | 0.390    | 0.262 |
| Black    |       |       | 0.135    | 0.001    | 0.033 | Black           |       |       | 0.178    | 0.002    | 0.010 |
| Hispanic |       |       |          | <.001    | 0.001 | Hispanic        |       |       |          | 0.461    | 0.292 |
| White    |       |       |          |          | 0.896 | White           |       |       |          |          | 0.487 |



|       |  |  |  |  |  |
|-------|--|--|--|--|--|
| Other |  |  |  |  |  |
|-------|--|--|--|--|--|

|       |  |  |  |  |  |
|-------|--|--|--|--|--|
| Other |  |  |  |  |  |
|-------|--|--|--|--|--|

| Surgery Intent >0 |       |       |          |          |       |
|-------------------|-------|-------|----------|----------|-------|
|                   | Asian | Black | Hispanic | NH-white | Other |
| Asian             |       | 0.08  | 0.02     | 0.361    | 0.396 |
| Black             |       |       | 0.731    | 0.163    | 0.427 |
| Hispanic          |       |       |          | 0.028    | 0.226 |
| White             |       |       |          |          | 0.77  |
| Other             |       |       |          |          |       |

| WPAI Work >0 |       |       |          |          |       |
|--------------|-------|-------|----------|----------|-------|
|              | Asian | Black | Hispanic | NH-white | Other |
| Asian        |       | 0.080 | 0.872    | 0.259    | 0.186 |
| Black        |       |       | 0.135    | 0.003    | 0.008 |
| Hispanic     |       |       |          | 0.602    | 0.357 |
| White        |       |       |          |          | 0.458 |
| Other        |       |       |          |          |       |

| GAD-7 ≥5 |       |       |          |          |       |
|----------|-------|-------|----------|----------|-------|
|          | Asian | Black | Hispanic | NH-white | Other |
| Asian    |       | 0.345 | 0.507    | 0.203    | 0.763 |
| Black    |       |       | 0.947    | 0.005    | 0.381 |
| Hispanic |       |       |          | 0.078    | 0.459 |
| White    |       |       |          |          | 0.74  |
| Other    |       |       |          |          |       |

| WPAI Time >0 |       |       |          |          |       |
|--------------|-------|-------|----------|----------|-------|
|              | Asian | Black | Hispanic | NH-white | Other |
| Asian        |       | 0.382 | 0.343    | 0.953    | 0.340 |
| Black        |       |       | 0.944    | 0.196    | 0.819 |
| Hispanic     |       |       |          | 0.101    | 0.762 |
| White        |       |       |          |          | 0.235 |
| Other        |       |       |          |          |       |

| PHQ-9 ≥5 |       |       |          |          |       |
|----------|-------|-------|----------|----------|-------|
|          | Asian | Black | Hispanic | NH-white | Other |
| Asian    |       | 0.761 | 0.272    | 0.772    | 0.327 |
| Black    |       |       | 0.189    | 0.514    | 0.243 |
| Hispanic |       |       |          | 0.28     | 0.948 |
| White    |       |       |          |          | 0.357 |
| Other    |       |       |          |          |       |

| WPAI Activities >0 |       |       |          |          |       |
|--------------------|-------|-------|----------|----------|-------|
|                    | Asian | Black | Hispanic | NH-white | Other |
| Asian              |       | 0.214 | 0.171    | 0.566    | 0.386 |
| Black              |       |       | 0.946    | 0.046    | 0.072 |
| Hispanic           |       |       |          | 0.026    | 0.057 |
| White              |       |       |          |          | 0.534 |
| Other              |       |       |          |          |       |

| Surgery Intent |       |       |          |          |       |
|----------------|-------|-------|----------|----------|-------|
|                | Asian | Black | Hispanic | NH-white | Other |
| Asian          |       | 0.052 | 0.003    | 0.245    | 0.429 |
| Black          |       |       | 0.670    | 0.074    | 0.241 |
| Hispanic       |       |       |          | 0.007    | 0.101 |
| White          |       |       |          |          | 0.946 |
| Other          |       |       |          |          |       |

| WPAI Overall |       |       |          |          |       |
|--------------|-------|-------|----------|----------|-------|
|              | Asian | Black | Hispanic | NH-white | Other |
| Asian        |       | 0.025 | 0.657    | 0.745    | 0.780 |
| Black        |       |       | 0.116    | 0.009    | 0.032 |
| Hispanic     |       |       |          | 0.781    | 0.532 |
| White        |       |       |          |          | 0.565 |
| Other        |       |       |          |          |       |

| GAD-7    |       |       |          |          |       |
|----------|-------|-------|----------|----------|-------|
|          | Asian | Black | Hispanic | NH-white | Other |
| Asian    |       | 0.892 | 0.440    | 0.254    | 0.885 |
| Black    |       |       | 0.378    | 0.345    | 0.961 |
| Hispanic |       |       |          | 0.081    | 0.471 |
| White    |       |       |          |          | 0.609 |
| Other    |       |       |          |          |       |

| WPAI Work |       |       |          |          |       |
|-----------|-------|-------|----------|----------|-------|
|           | Asian | Black | Hispanic | NH-white | Other |
| Asian     |       | 0.032 | 0.545    | 0.760    | 0.971 |
| Black     |       |       | 0.172    | 0.013    | 0.055 |
| Hispanic  |       |       |          | 0.621    | 0.565 |
| White     |       |       |          |          | 0.772 |
| Other     |       |       |          |          |       |

| PHQ-9    |       |       |          |          |       |
|----------|-------|-------|----------|----------|-------|
|          | Asian | Black | Hispanic | NH-white | Other |
| Asian    |       | 0.581 | 0.787    | 0.811    | 0.965 |
| Black    |       |       | 0.463    | 0.636    | 0.740 |
| Hispanic |       |       |          | 0.614    | 0.815 |
| White    |       |       |          |          | 0.933 |
| Other    |       |       |          |          |       |

| WPAI Time |       |       |          |          |       |
|-----------|-------|-------|----------|----------|-------|
|           | Asian | Black | Hispanic | NH-white | Other |
| Asian     |       | 0.209 | 0.792    | 0.475    | 0.724 |
| Black     |       |       | 0.397    | 0.033    | 0.305 |
| Hispanic  |       |       |          | 0.403    | 0.624 |
| White     |       |       |          |          | 0.926 |
| Other     |       |       |          |          |       |

| WPAI Activities |       |       |          |          |       |
|-----------------|-------|-------|----------|----------|-------|
|                 | Asian | Black | Hispanic | NH-white | Other |
| Asian           |       | 0.195 | 0.099    | 0.283    | 0.901 |
| Black           |       |       | 0.116    | 0.009    | 0.032 |
| Hispanic        |       |       |          | 0.781    | 0.523 |
| White           |       |       |          |          | 0.565 |
| Other           |       |       |          |          |       |
